# Supplementary material for: Acute Kidney Injury-Induced Circulating TNFR1/2 Elevations Correlate with Persistent Kidney Injury and Progression to Fibrosis
Source: MDPI journal article supplement (doi:10.3390/cells12182214), 2023-09-05
Supplement: s1 [file s1]

## Supplemental Files

### Table of contents:

1. **Supplemental Figure S1:** Urinary TNFR1 and TNFR2 concentration in AKI patients without urinary creatinine correction and their correlation to cTNFR1 and cTNFR2 respectively.
2. **Supplemental Figure S2:** Long-term TNFR1/2 elevations after injury and BUN correlations to fibrosis markers
3. **Supplemental Table S1.** qPCR primer sequences

Supplemental Figure S1: A. Urinary TNFR1 and TNFR2 concentration in AKI patients without urinary creatinine correction and, B. uTNFR1 and uTNFR2 correlation to cTNFR1 and cTNFR2 respectively.

A

Urinary TNFR1/2  
(ELISA, no uCr correction)

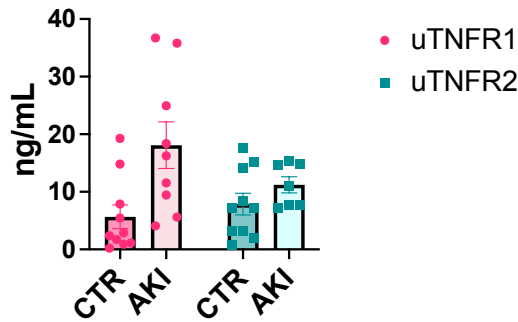

B

Correlation TNFR1

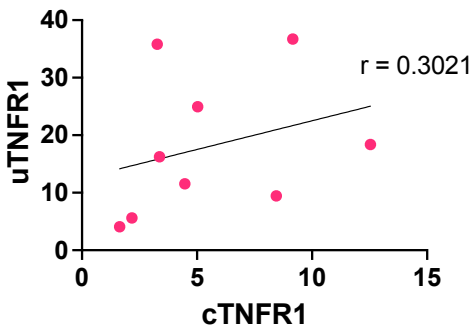

Correlation TNFR2

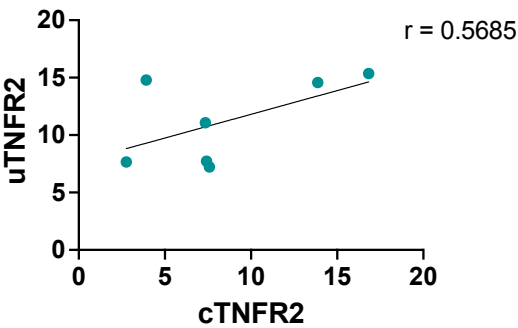

**Supplemental Figure S2:** Long-term TNFR1/2 elevations after injury and BUN correlation to fibrosis markers. A. Sustained cTNFR1/2 elevations at day 28 post injury in the FVB/N mouse strain. B. Bulk mRNA sequencing analysis showing sustained kidney TNFR2 mRNA expression after IRI. C. Representative images of low and high levels of Sirius red staining at day 28 post IRI. D. Peak BUN (day 7) levels do not correlate to fibrosis/injury gene expression (day 28) in the aristolochic acid injury model. E. BUN day 28 levels do not correlate to fibrosis/injury gene expression at day 28 of the aristolochic acid injury model.

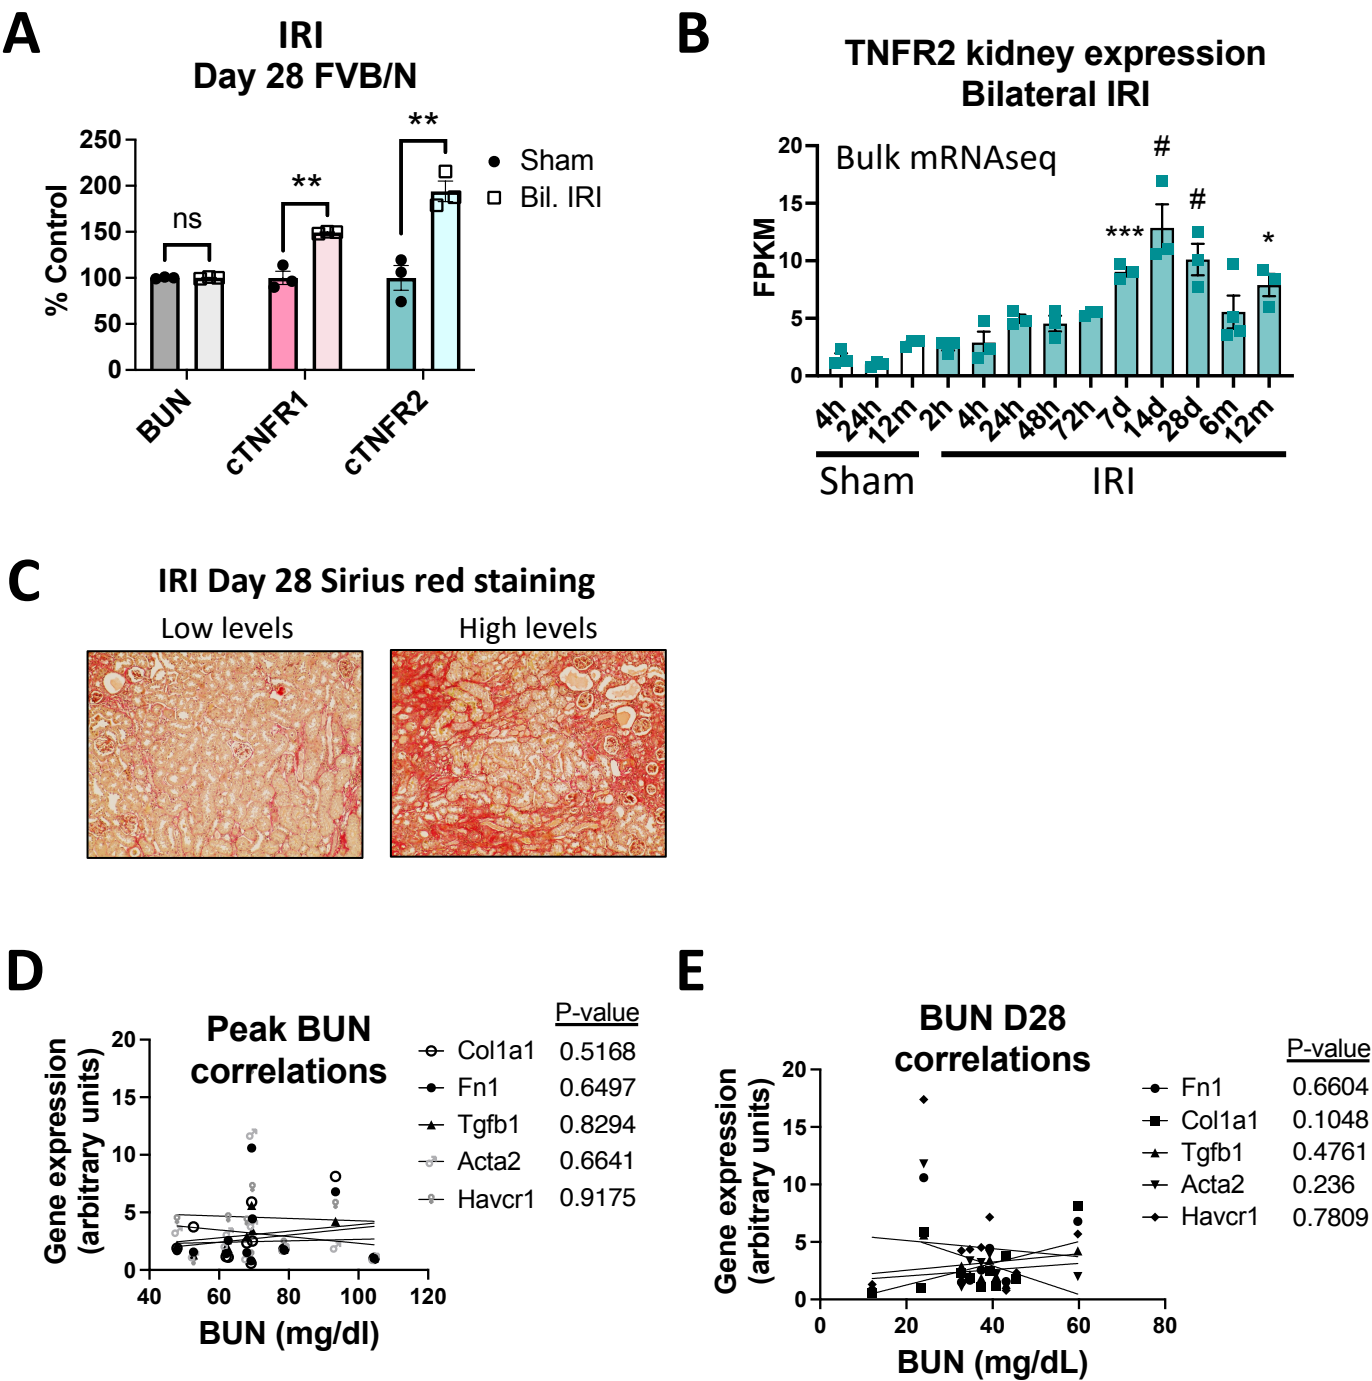

Supplemental Table S1: qPCR primer sequences

| Target gene | Synonym     | Direction | Sequence               |
|-------------|-------------|-----------|------------------------|
| Acta2       | αSMA        | Forward   | AGCCATCTTTCATTGGGATGGA |
| Acta2       | αSMA        | Reverse   | TACCCCCTGACAGGACGTTG   |
| Col1a1      | collagen 1a | Forward   | CCTGACGCATGGCCAAGAAG   |
| Col1a1      | collagen 1a | Reverse   | TACCTCGGGTTTCCACGTCT   |
| Fn1         | fibronectin | Forward   | GGTTCGGGAAGAGGTTGTGA   |
| Fn1         | fibronectin | Reverse   | CACTCCTCTCCAATGGCGTA   |
| Gapdh       |             | Forward   | ACCACAGTCCATGCCATCAC   |
| Gapdh       |             | Reverse   | TCCACCACCCTGTTGCTGTA   |
| Havcr1      | Kim1        | Forward   | ACAACAGCTGAGGTGACAGG   |
| Havcr1      | Kim1        | Reverse   | TTCCCTGGAGGGATTGCTTC   |
| Tgfb1       | TGFβ        | Forward   | CTGCTGACCCCCACTGATAC   |
| Tgfb1       | TGFβ        | Reverse   | AGCCCTGTATTCCGTCTCCT   |
| Tnfrsf1a    | TNFR1       | Forward   | ACGAATCACTCTGCTCCGTG   |
| Tnfrsf1a    | TNFR1       | Reverse   | TCGCAAGGTCTGCATTGTCA   |
| Tnfrsf1b    | TNFR2       | Forward   | GAGATGCCAAGGTGCCTCAT   |
| Tnfrsf1b    | TNFR2       | Reverse   | AACTGGGTGCTGTGGTCAAC   |
